# Supplementary material for: Identification of Multiple Pancreatic and Extra-Pancreatic Pathways Underlying the Glucose-Lowering Actions of Acacia arabica Bark in Type-2 Diabetes and Isolation of Active Phytoconstituents
Source: MDPI journal article supplement (doi:10.3390/plants10061190), 2021-06-11
Supplement: s1 [file s1]

**Supplementary Figure 1: Dose-dependent effects of various concentrations of (A & B) hot water extract of *A. arabica* bark, (C) peak samples, (D) Quercetin & (E) Kaempferol at 5.6/16.7mM glucose on LDH release from BRIN-BD11 cells**

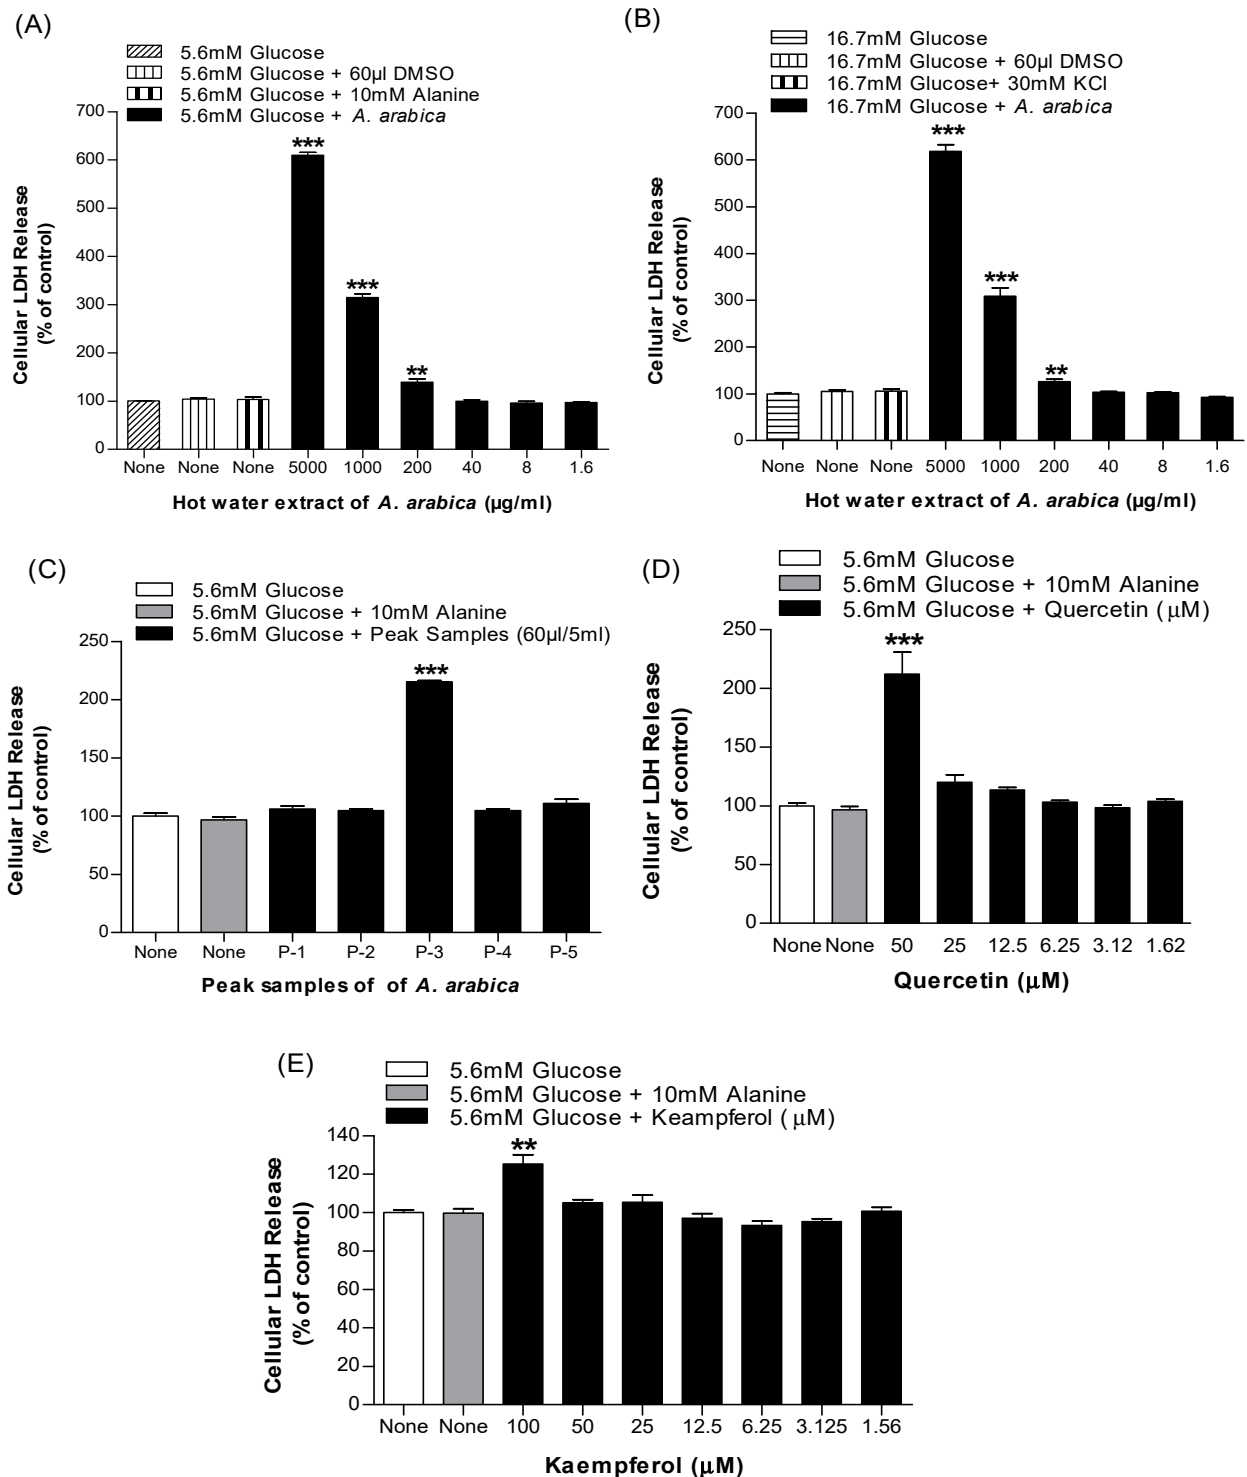

Values are Mean±SEM for n= 4, for LDH release from BRIN BD11 cells. \*\*p<0.01 and \*\*\*p<0.001 compared to control (5.6mM glucose alone).
